# Supplementary material
Source: PubMed Central journal article supplement (PMC6717913)

Supplemental Figure 1

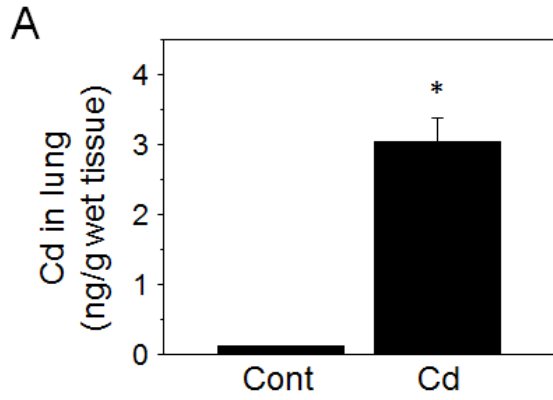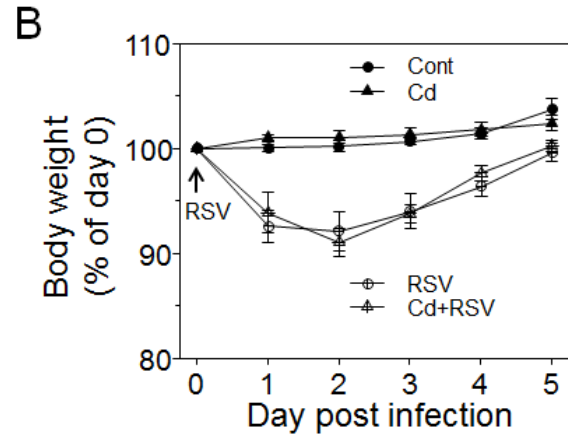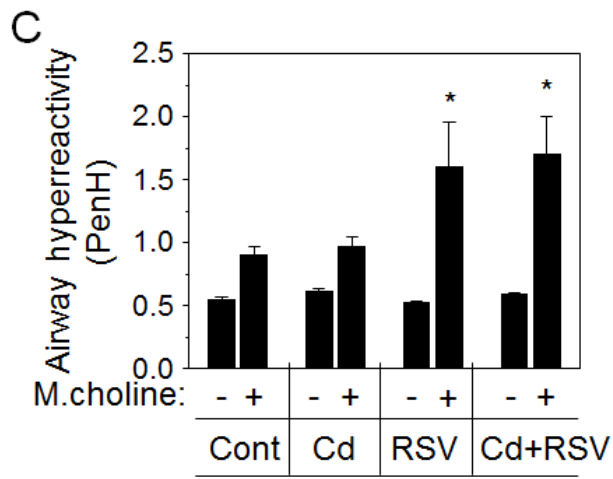

Supplement: mmc1.pdf [file mmc1.pdf]

Supplemental Figure 2

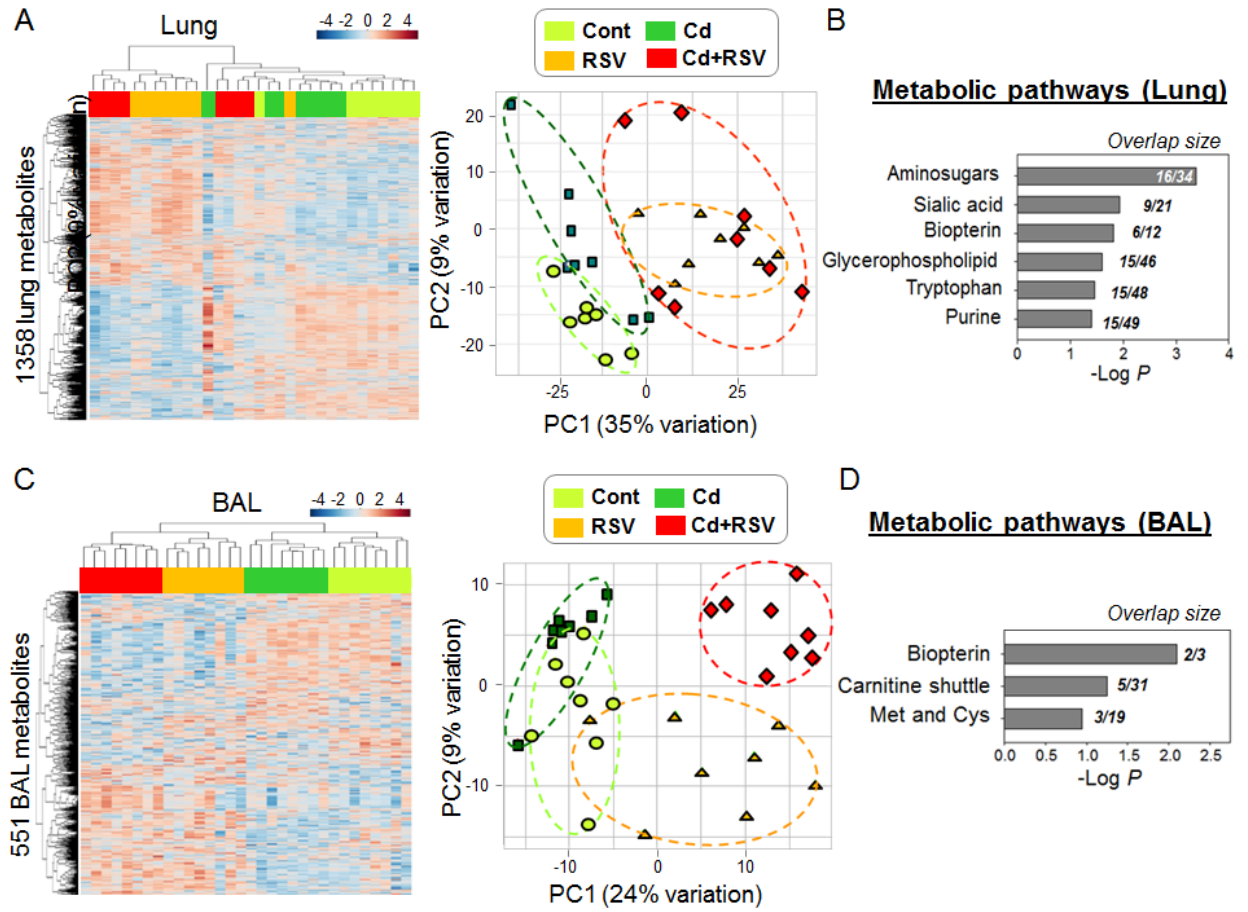

Supplement: mmc2.pdf [file mmc2.pdf]
